# Supplementary material
Source: Springer Nature journal article supplement (https://www.springermedizin.de/resource/supplementary/12913_2014_3403_MOESM3_ESM.pdf/9532756)

## Appropriate Quality of Care

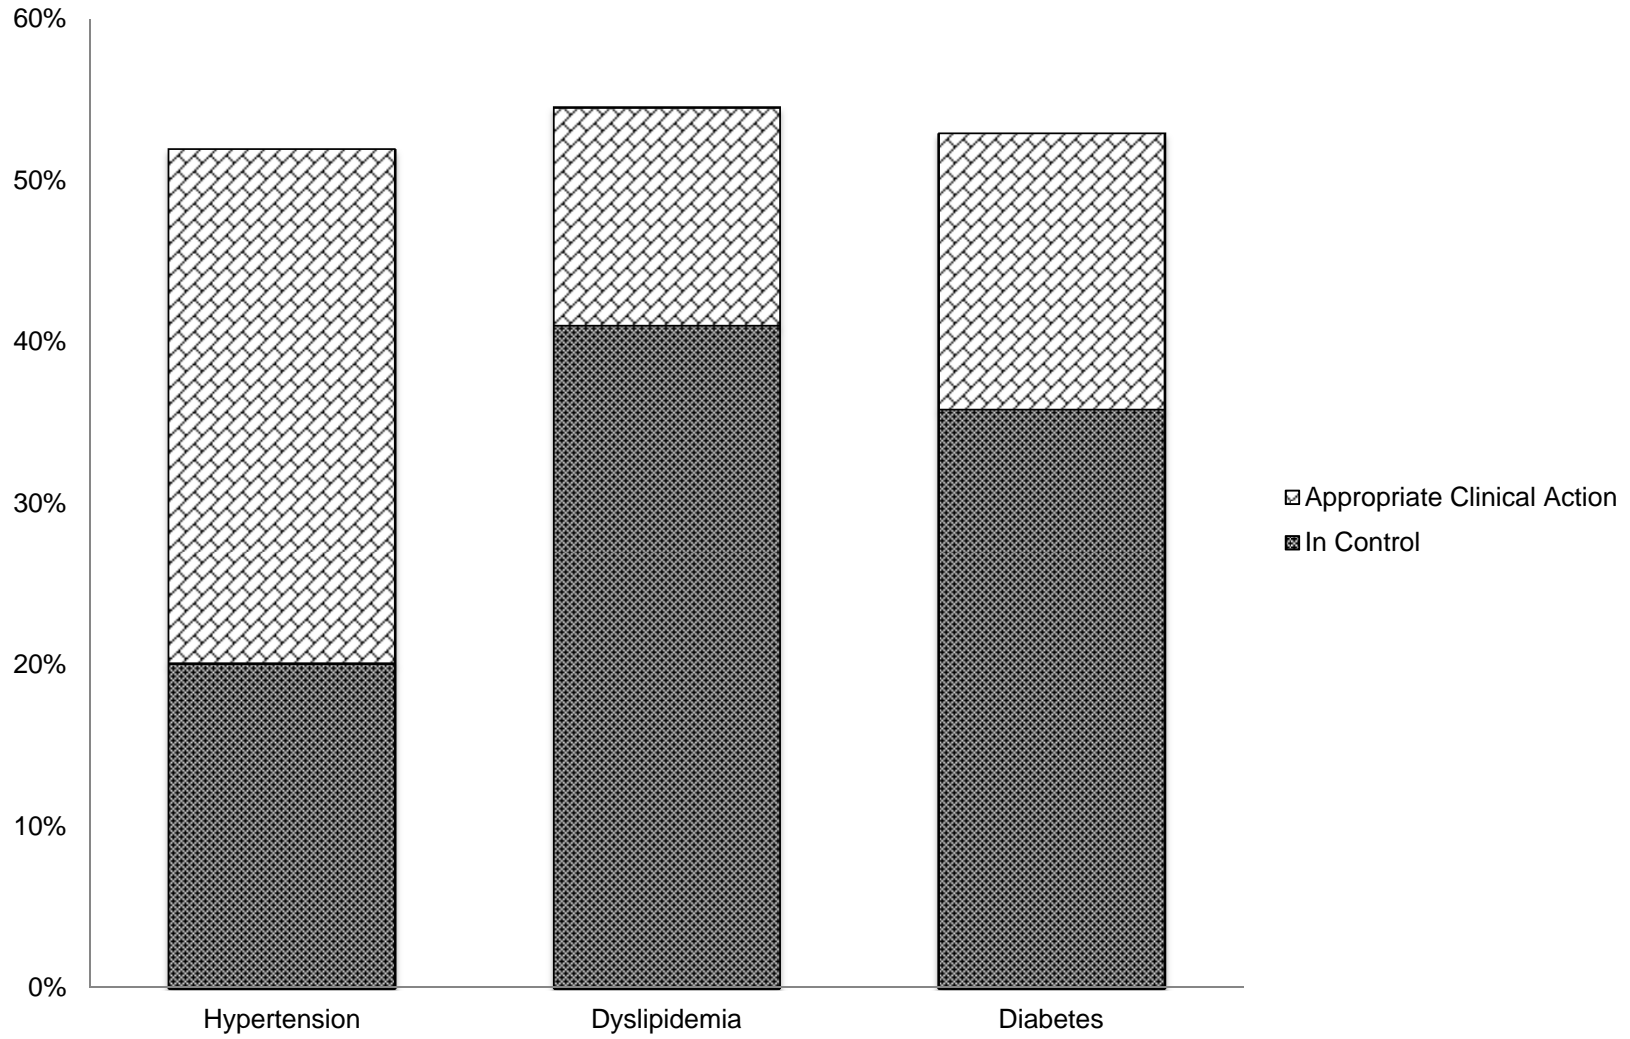

Supplement: MOESM3 [file 9532756]
